# Supplementary material for: The collaborative role of molecular conformation and energetics in the binding of gas-phase non-covalent polymer/amine complexes
Source: Royal Society of Chemistry journal article supplement (doi:10.1039/c1cp22936b), 2011-11-09
Supplement: c1cp22936b.pdf [file c1cp22936b.pdf]

1 1. Supplementary Information

2 Table S1: Harmonic vibrational frequencies used in the RRKM modeling of  
 3 [PMMA<sub>n</sub>][DAA+mH]<sup>+m</sup> complexes

|                                       | Harmonic vibrational frequencies (cm <sup>-1</sup> )                                                                                                                                                                                                                                                                                                                                                                                                                                                                                                                                                                               |
|---------------------------------------|------------------------------------------------------------------------------------------------------------------------------------------------------------------------------------------------------------------------------------------------------------------------------------------------------------------------------------------------------------------------------------------------------------------------------------------------------------------------------------------------------------------------------------------------------------------------------------------------------------------------------------|
| Monomer modes                         | 17, 90, 113, 117, 129, 192, 222, 267, 306, 444, 549, 604, 781, 816, 847, 852, 954, 979, 1007, 1012, 1015, 1075, 1123, 1133, 1140, 1141, 1148, 1150, 1150, 1154, 1179, 1188, 1194, 1281, 1700, 2498, 2540, 2541, 2543, 2546, 2553, 2560, 2615, 2618, 2618                                                                                                                                                                                                                                                                                                                                                                           |
| Complex modes                         | 13, 19, 21, 27, 36, 43                                                                                                                                                                                                                                                                                                                                                                                                                                                                                                                                                                                                             |
| Diaminobutane(1H <sup>+</sup> ) modes | 59, 69, 109, 163, 163, 245, 372, 404, 550, 759, 816, 874, 919, 1019, 1058, 1073, 1143, 1185, 1200, 1213, 1220, 1223, 1254, 1264, 1319, 1330, 1344, 1356, 1365, 1382, 1391, 1399, 1402, 1469, 1638, 1646, 1654, 1728, 2963, 2977, 3012, 3025, 3035, 3044, 3079, 3099, 3216, 3223, 3351, 3435, 3475,                                                                                                                                                                                                                                                                                                                                 |
| Diaminohexane(1H <sup>+</sup> ) modes | 38, 45, 83, 95, 95, 115, 164, 236, 239, 309, 406, 528, 544, 748, 774, 825, 900, 934, 978, 1037, 1056, 1074, 1163, 1181, 1183, 1197, 1204, 1208, 1226, 1228, 1229, 1252, 1257, 1264, 1303, 1328, 1336, 1348, 1360, 1373, 1382, 1387, 1396, 1404, 1405, 1407, 1436, 1469, 1638, 1646, 1654, 1731, 2963, 2978, 3003, 3016, 3025, 3030, 3039, 3047, 3075, 3084, 3096, 3104, 3217, 3224, 3351, 3427, 3470,                                                                                                                                                                                                                              |
| Diaminodecane(1H <sup>+</sup> ) modes | 18, 24, 44, 45, 59, 77, 89, 103, 112, 116, 118, 164, 212, 214, 233, 322, 400, 433, 516, 540, 571, 740, 750, 767, 794, 833, 882, 934, 970, 983, 1023, 1049, 1056, 1075, 1167, 1176, 1179, 1188, 1191, 1197, 1203, 1207, 1208, 1213, 1221, 1223, 1232, 1234, 1235, 1235, 1248, 1264, 1267, 1269, 1288, 1311, 1325, 1332, 1350, 1350, 1365, 1376, 1383, 1387, 1395, 1401, 1403, 1404, 1406, 1408, 1409, 1410, 1426, 1447, 1456, 1469, 1638, 1647, 1655, 1732, 2963, 2979, 3000, 3004, 3010, 3018, 3025, 3026, 3032, 3038, 3041, 3048, 3074, 3077, 3082, 3088, 3094, 3100, 3104, 3107, 3217, 3225, 3352, 3421, 3466,                   |
| Diaminobutane(2H <sup>+</sup> ) modes | 62, 80, 113, 164, 167, 169, 367, 404, 546, 760, 817, 919, 1017, 1053, 1062, 1069, 1181, 1192, 1215, 1217, 1222, 1238, 1261, 1262, 1271, 1275, 1331, 1351, 1366, 1385, 1387, 1397, 1411, 1424, 1639, 1639, 1643, 1644, 1648, 1648, 2948, 2949, 2999, 3013, 3013, 3020, 3068, 3084, 3180, 3180, 3195, 3196, 3326, 3328                                                                                                                                                                                                                                                                                                               |
| Diaminohexane(2H <sup>+</sup> ) modes | 44, 50, 87, 99, 99, 118, 164, 166, 239, 307, 402, 526, 539, 750, 776, 825, 899, 976, 1033, 1049, 1058, 1068, 1178, 1181, 1197, 1198, 1199, 1207, 1227, 1229, 1239, 1240, 1253, 1269, 1269, 1270, 1313, 1338, 1355, 1368, 1382, 1390, 1392, 1397, 1398, 1404, 1413, 1436, 1643, 1643, 1644, 1644, 1649, 1649, 2957, 2957, 2999, 3010, 3020, 3020, 3023, 3034, 3071, 3078, 3089, 3099, 3200, 3200, 3207, 3207, 3338, 3339                                                                                                                                                                                                            |
| Diaminodecane(2H <sup>+</sup> ) modes | 24, 25, 46, 50, 59, 80, 90, 106, 114, 117, 120, 164, 164, 212, 212, 320, 396, 431, 510, 540, 569, 742, 753, 769, 796, 833, 881, 932, 979, 1018, 1044, 1055, 1057, 1058, 1174, 1178, 1180, 1185, 1188, 1202, 1203, 1203, 1204, 1211, 1219, 1221, 1225, 1234, 1234, 1235, 1246, 1254, 1266, 1266, 1266, 1272, 1294, 1315, 1333, 1346, 1359, 1369, 1382, 1387, 1390, 1395, 1396, 1399, 1400, 1405, 1405, 1407, 1408, 1421, 1441, 1451, 1641, 1641, 1645, 1645, 1653, 1653, 2961, 2961, 3000, 3003, 3009, 3016, 3023, 3023, 3024, 3030, 3036, 3041, 3073, 3075, 3079, 3085, 3091, 3097, 3102, 3106, 3214, 3214, 3215, 3215, 3347, 3347 |

4

5

1 Table S2: Summary of m/z for non-covalent complexes between [PMMA<sub>n</sub>] and cationizing agent

2

| <b>DAA</b>    | [PMMA <sub>n</sub> ][DAA+1H] <sup>+</sup> (Da) | [PMMA <sub>n</sub> ][DAA+2H] <sup>2+</sup> (Da)<br>3 |
|---------------|------------------------------------------------|------------------------------------------------------|
| Diaminobutane | 91.12+ (100.05) <b>n</b>                       | 46.05+ (50.03) <b>n</b> 4                            |
| Diaminohexane | 119.15+ (100.05) <b>n</b>                      | 59.58+ (50.03) <b>n</b> 5                            |
| Diaminodecane | 175.22+ (100.05) <b>n</b>                      | 88.11+ (50.03) <b>n</b> 6                            |

7  
8  
9  
10  
11  
12  
13  
14  
15  
16  
17  
18  
19  
20  
21  
22  
23  
24  
25

1 Table S3: RRKM calculated  $E_0$ ,  $\Delta S^\ddagger$  and  $\alpha$  of  $[\text{PMMA}_n][\text{DAA}+1\text{H}]^{1+}$  complexes

| n  | $[\text{PMMA}_n][\text{DAB}+1\text{H}]^{1+}$ |                                                            |                                | $[\text{PMMA}_n][\text{DAH}+1\text{H}]^{1+}$ |                                                            |                                | $[\text{PMMA}_n][\text{DAD}+1\text{H}]^{1+}$ |                                                            |                                |
|----|----------------------------------------------|------------------------------------------------------------|--------------------------------|----------------------------------------------|------------------------------------------------------------|--------------------------------|----------------------------------------------|------------------------------------------------------------|--------------------------------|
|    | $E_0$ (eV)                                   | $\Delta S^\ddagger$<br>J K <sup>-1</sup> mol <sup>-1</sup> | $\alpha$<br>K eV <sup>-1</sup> | $E_0$ (eV)                                   | $\Delta S^\ddagger$<br>J K <sup>-1</sup> mol <sup>-1</sup> | $\alpha$<br>K eV <sup>-1</sup> | $E_0$ (eV)                                   | $\Delta S^\ddagger$<br>J K <sup>-1</sup> mol <sup>-1</sup> | $\alpha$<br>K eV <sup>-1</sup> |
| 7  | 0.81±0.02                                    | -63±7                                                      | 421±16                         | 0.91±0.01                                    | -67±7                                                      | 444±25                         | 0.87±0.01                                    | -73±3                                                      | 458±13                         |
| 8  | 0.85±0.01                                    | -52±6                                                      | 380±14                         | 1.01±0.01                                    | -30±5                                                      | 336±9                          | 1.03±0.01                                    | -32±4                                                      | 378±10                         |
| 9  | 0.96±0.02                                    | -27±7                                                      | 348±13                         | 1.13±0.02                                    | -24±10                                                     | 351±22                         | 1.02±0.01                                    | -35±4                                                      | 357±11                         |
| 10 | 1.01±0.01                                    | -1±4                                                       | 291±5                          | 1.1±0.01                                     | -10±4                                                      | 281±5                          | 1.1±0.03                                     | -15±10                                                     | 319±17                         |
| 11 | 1.11±0.02                                    | 16±9                                                       | 284±12                         | 1.21±0.02                                    | 0±11                                                       | 297±18                         | 1.18±0.02                                    | -3±6                                                       | 317±7                          |
| 12 | 1.15±0.02                                    | 26±4                                                       | 232±7                          | 1.32±0.01                                    | 22±5                                                       | 278±8                          | 1.22±0.01                                    | 26±6                                                       | 250±9                          |
| 13 | 1.3±0.01                                     | 48±9                                                       | 254±6                          | 1.31±0.02                                    | 42±8                                                       | 236±9                          | 1.31±0.03                                    | 34±10                                                      | 262±11                         |
| 14 | 1.35±0.02                                    | 76±7                                                       | 214±9                          | 1.40±0.03                                    | 43±7                                                       | 255±10                         | 1.36±0.02                                    | 62±5                                                       | 211±13                         |
| 15 | 1.43±0.03                                    | 99±2                                                       | 190±11                         | 1.38±0.04                                    | 70±11                                                      | 209±6                          | 1.43±0.01                                    | 80±2                                                       | 195±10                         |

2

3 Table S4: RRKM calculated  $E_0$ ,  $\Delta S^\ddagger$  and  $\alpha$  of  $[\text{PMMA}_n][\text{DAA}+2\text{H}]^{2+}$  complexes

| n  | $[\text{PMMA}_n][\text{DAB}+2\text{H}]^{2+}$ |                                                            |                                | $[\text{PMMA}_n][\text{DAH}+2\text{H}]^{2+}$ |                                                            |                                | $[\text{PMMA}_n][\text{DAD}+2\text{H}]^{2+}$ |                                                            |                                |
|----|----------------------------------------------|------------------------------------------------------------|--------------------------------|----------------------------------------------|------------------------------------------------------------|--------------------------------|----------------------------------------------|------------------------------------------------------------|--------------------------------|
|    | $E_0$ (eV)                                   | $\Delta S^\ddagger$<br>J K <sup>-1</sup> mol <sup>-1</sup> | $\alpha$<br>K eV <sup>-1</sup> | $E_0$ (eV)                                   | $\Delta S^\ddagger$<br>J K <sup>-1</sup> mol <sup>-1</sup> | $\alpha$<br>K eV <sup>-1</sup> | $E_0$ (eV)                                   | $\Delta S^\ddagger$<br>J K <sup>-1</sup> mol <sup>-1</sup> | $\alpha$<br>K eV <sup>-1</sup> |
| 8  | 0.63±0.01                                    | -90±5                                                      | 395±27                         | 0.94±0.02                                    | -77±5                                                      | 428±30                         | 1.22±0.03                                    | -62±11                                                     | 410±24                         |
| 9  | 0.78±0.01                                    | -56±4                                                      | 348±12                         | 1.32±0.02                                    | 0±9                                                        | 378±14                         | 1.43±0.02                                    | -20±14                                                     | 352±32                         |
| 10 | 1.02±0.02                                    | 10±7                                                       | 269±7                          | 1.46±0.02                                    | 45±7                                                       | 301±9                          | 1.64±0.02                                    | 14±13                                                      | 360±25                         |
| 11 | 1.35±0.04                                    | 44±13                                                      | 328±13                         | 1.53±0.03                                    | 48±9                                                       | 303±9                          | 1.76±0.03                                    | 40±11                                                      | 325±17                         |
| 12 | 1.47±0.05                                    | 94±14                                                      | 279±14                         | 1.76±0.06                                    | 80±18                                                      | 300±16                         | 1.89±0.05                                    | 75±16                                                      | 313±18                         |
| 13 | 1.66±0.05                                    | 133±15                                                     | 257±7                          | 1.82±0.04                                    | 105±10                                                     | 264±6                          | 1.97±0.07                                    | 104±23                                                     | 278±19                         |
| 14 | 1.67±0.06                                    | 173±14                                                     | 194±3                          | 1.95±0.04                                    | 128±13                                                     | 246±9                          | 2.17±0.07                                    | 153±20                                                     | 251±10                         |
| 15 | 1.77±0.02                                    | 223±6                                                      | 184±4                          | 1.99±0.03                                    | 229±8                                                      | 205±15                         | 2.17±0.02                                    | 173±6                                                      | 224±23                         |

4

5

6
